# Supplementary material
Source: Research Square preprint supplement (doi:10.21203/rs.3.rs-9040346/v1)
Supplement: Supplementary file 1 [file b98ba69b092ea484ee519233.docx]

**Electronic Supplementary Material**

**Importance of proximate presence of predators in prey responses**

Hisanori Okamiya, Osamu Kishida

* Corresponding Author: h.okamiya@gmail.com

**Supplementalry Methods**

***Collection and Maintenance of organisms***

From late March to late July 2020, we collected 20 *Rana pirica* egg masses and 100 *Aeshna* larvae (*Aeshna crenata* and *A. juncea*) from two and four ponds, respectively, in Hokkaido, Japan. All organisms were transferred to the experimental room at the Tomakomai Experimental Forest, Hokkaido University (TOEF).

All frog egg masses were mixed for each collection site, and evenly distributed among 22-L containers filled with well water that was maintained at 10 °C. After hatching, the tadpoles were fed rabbit chow ad libitum until the beginning of the experiment. Each *Aeshna* larva was kept individually in a 0.1-L container filled with well water that was maintained at 10 °C. They were fed one *R. pirica* tadpole every other day until the beginning of the experiment. Water in all containers was changed every third day.

***Disabling mouthparts of Aeshna larvae***

To detect the effects of proximate risk on prey trait responses, prey should be exposed to predators that can physically attack but cannot consume the prey. Therefore, we disabled the mentum (extendable capturing organ of larval dragonflies) of *Aeshna* larvae, preventing their actual consumption in two ways as follow: (1) covering the labial palps with glass beads (1 mm in diameter) using instant glue (glue beads method) or (2) removing the labial palps with dissecting scissors (removal method). Similar mouthpart manipulations have been used to isolate the non-consumptive effects of predators in other systems (e.g., Van Buskirk 1989; Wissinger and McGrady 1993; Rudolf 2008; Lagrue et al. 2015). The glue beads method had almost no mortality effect on *Aeshna* larvae, but it can only be used for large sized individuals. The removal method is suitable for any individual size but has been shown to increase mortality somewhat due to infection or trauma (Van Buskirk 1989). Thus, the glue beads method was used in the laboratory experiment (see below) with large-sized *Aeshna* larvae, while the removal method was used in the field experiment (see below) with smaller *Aeshna* larvae. We observed no obvious behavioral changes associated with covering or removal of labial palps. All manipulated *Aeshna* larvae were observed attacking (i.e., labium extension) and contacting prey tadpoles, but were not able to capture or kill any prey during a preliminary experiment.

***Laboratory experiment***

*Experimental design*. —The objective of the experiment was to evaluate the difference in risk-induced responses of prey in the presence or absence of direct attack from a predator. The experiment was thus conducted at a practical scale in small experimental units to ensure predator-prey encounters. An experimental unit was a rectangular enclosure (18 × 25 × 14 cm) made of 1 mm nylon mesh. In each enclosure, a predator cage (5 × 5 × 13 cm) was hung 1 cm above the bottom of the enclosure. The predator cage was constructed with 1.5 mm nylon mesh to allow prey to detect chemical, visual, and tactile cues from the predator, but prevented direct contact between prey and predator. Two experimental units (i.e., two enclosures) were assigned to a 13-L plastic container (38 × 25 × 14 cm) filled with 9 L of well water that was constantly circulated between the two units by aerated water flow.

The experiment was started at 09:00 on 1 July 2020. Ten similarly sized tadpoles were haphazardly chosen from the holding container and placed in each experimental unit. Then, one *Aeshna* larva was placed either inside or outside the predator cage in the experimental unit, according to treatment (i.e., proximate risk versus remote risk treatments). All *Aeshna* larvae used in the experiment had their labial palps covered with glass beads, which prevented actual predation (see above). One experimental unit in a container was assigned to the proximate risk treatment, and the other unit was assigned to the remote risk treatment. A container containing two units, each with an empty predator cage, was assigned to the control treatment. Each of the three treatments was replicated ten times.

At the start of the experiment, the snout–vent length of the tadpoles and the total length of the *Aeshna* larvae were 14.18 ± 0.90 mm (mean ± SD, *n* = 300) and 38.38 ± 1.33 mm (mean ± SD, *n* = 20), respectively. The tadpoles in each experimental unit were fed 100 mg rabbit chow at 12:00–13:00 every third day throughout the experiment. To maintain adequate water quality, half of the water in all containers was changed every third day. We ran the experiment for ten days under a natural 14 h:10 h light-dark regime and at a temperature of approximately 20 °C.

*Measuring behavior and morphology*. —To quantify the behavioral risk-induced response, we calculated the activity of tadpoles. Each experimental unit was approached slowly and the number of tadpoles swimming or feeding during a five-second observation interval was counted. This number was divided by the total number of tadpoles in the unit to record activity. It has previously been shown that observers do not disturb tadpole activities when such observations are made (Fraker 2008; Jara and Perotti 2010). Observations were conducted twice per day (09:00 and 21:00) during the experimental period.

To obtain data on tadpole morphology, all tadpoles were collected from each experimental unit at the end of experiment and anaesthetized in 1 ‰ MS-222. We then scanned all tadpoles dorsally and laterally. It has been shown that size-adjusted tail depth is a reliable indicator for identifying *Aeshna*-induced morphology (Kishida and Nishimura 2005). Thus, we used the scanned images to measure two traits of each tadpole: snout-vent length and maximum tail depth. The measurements were taken with Image J software (https://imagej.nih.gov/ij). Because unexpected predation occurred in one unit of the proximate risk treatment, data from the container containing that unit were excluded from analyses.

***Field experiment***

*Experimental design*. —In the laboratory experiment, the proximate risk effect of predator attack may have been overestimated due to the unnaturally high predator density. Conversely, we did not feed the *Ashna* larvae during the experiment which may have inhibited the release of chemical cues, and hence underestimated the effect, because predator starvation is generally negatively correlated with the amount of chemical cues released (Laurila et al. 1997; Schoeppner and Relyea 2009). To address these issues, we conducted an experiment in the field to examine the effects of proximate risk from *Aeshna* larvae on trait responses of *R. pirica* tadpoles, using typical densities of the organisms in the natural environment and ensuring conditions for the release of sufficient predation-risk chemical cues.

The experiment was conducted on a riverbank at TOEF. Thirty large plastic tubs (77 × 58.5 × 29.5 cm), arranged in 2 × 15 array and placed approximately 30 cm apart, were used as experimental units. Four liters of sand substrate from an adjacent dry riverbed was added to each tub. The sand contained organic detritus that provided nutrients for tadpoles. One week before the start of the experiment, the tubs were filled with 30 L of water from a nearby river. Emergent plants from the same river were added as perches for *Aeshna* larvae. Each tub further received two cylindrical predator cages (diameter 8 cm, height 8 cm) made of polypropylene mesh (mesh size 3 mm) placed at the bottom. The cage allowed remote cues from predators to diffuse in the water but prevented the predators from attacking prey. All the tubs were covered with net to prevent predatory birds from entering.

The experiment was started at 09:00 on 24 July 2020. We ran three treatments in accordance with the laboratory experiment (i.e., proximate risk, remote risk, and control treatment). Twenty similarly sized tadpoles were haphazardly chosen from the holding container and placed in each experimental unit. We also assigned two *Aeshna* larvae to each appropriate tub (inside the predator cages in the remote risk treatment and outside the cages in the proximate risk treatment). These *Aeshna* larvae were fed one 300 mg tadpole and then had their labial palps removed just before assignment. Actual predation of *Aeshna* larvae was prevented due to the removal of their labial palps (see above). To ensure conspecific cues from the prey tadpole, predator water (0.1 L) from the *Aeshna* container was added at the same time. Three days after the experiment started, the assigned *Aeshna* larvae were replaced with new individuals that were fed one 300 mg tadpole and then had labial palps removed just before replacement. Predation water (0.1 L) from the *Aeshna* containers was also added. The replacement interval of *Aeshna* larvae was within the range of methods typically used in previous studies (e.g., Laurila et al. 2006, 2008; Kishida et al. 2011). This allowed for the release of sufficient remote cues (especially chemical cues) from predators and prey conspecifics. In control and proximate risk treatments, we controlled for effects of disturbance by removing and replacing empty predator cages when predators were replaced. Each of the three treatments was randomly positioned and replicated ten times.

The densities of *R. pirica* tadpoles (44 individuals/m2) and *Aeshna* larvae (4.4 individuals/m2) used in this experiment were within the range that can be observed under natural conditions (Van Buskirk 2002; Kishida and Nishimura 2006). At the start of the experiment, the snout–vent length of the tadpoles and the total length of the *Aeshna* larvae were 12.46 ± 0.75 mm (mean ± SD, *n* = 600) and 32.68 ± 4.57 mm (mean ± SD, *n* = 80), respectively. The tadpoles relied on detritus and periphyton as food. Water levels were maintained by adding river water as appropriate. We ran the experiment for six days under a natural 14 h:10 h light-dark regime and at a water temperature of approximately 20 °C.

*Measuring behavior and morphology*. —We obtained data on tadpole activity and morphology using the same methods as in the laboratory experiment. During the field experiment, one tadpole death occurred in one proximate risk treatment unit and two remote risk treatment units. For two of these three units, where we knew day at which tadpole mortality occurred, the total number of tadpoles used to calculate activity was changed from 20 to 19 after death occurred. The remaining unit (remote risk treatment), where the date of death was unknown, was excluded from the analysis of activity. Mortality of *Aeshna* larvae occurred in five units each in the proximate risk and remote risk treatments during the experiment. The average number of mortalities in the units where mortality occurred was 1.1 individuals. However, since the mortality of *Aeshna* larvae did not significantly affect tadpole activity (repeated measures ANOVA; *F*1, 15 *=* 2.53; *P* = 0.133; Table S2) and morphology (LMM; *F*1, 52.91 *=* 1.36; *P* = 0.249, Table S3), we used all data in the analysis.

***Statistical analyses***

All statistical procedures were performed with R software (ver. 3.6.2; R Core Team 2019). The activity data were logit transformed prior to analysis to meet assumptions of analysis of variance (ANOVA). To examine the difference in activity rate of tadpoles between treatments, repeated measures ANOVAs were conducted with treatment (proximate risk, remote risk, and control) as a factor and time as a repeated measure. When a significant effect of treatment was found, post-hoc pairwise multiple comparisons among treatments were conducted with the sequential Bonferroni procedure. Type III sums of squares were used to account for our unbalanced design. The repeated measures ANOVAs were conducted using the open-source R code anovakun 4.8.0 (Iseki 2016).

Before analyses for tadpole morphology, the measurements of maximum tail depth were corrected for body size. To do this, we calculated the regression of maximum tail depth (MTD) against snout-vent length (SVL), and we obtained size-adjusted maximum tail depth (MTDadj) by using the following equation: MTDadj = MTD + b (SVLmean – SVL), where b = the regression coefficient of SVL, and SVLmean = overall average SVL of all tadpoles. To examine the difference in size-adjusted maximum tail depth of tadpoles among treatments, linear mixed models (LMMs) were used with treatment as a fixed factor and experimental unit per treatment as a random factor. Significant differences among treatments were further analysed using post hoc pairwise multiple comparisons with Tukey’s HSD tests. We used the packages lmerTest (Kuznetsova et al. 2017) for the LMMs and multcomp (Hothorn et al. 2008) for multiple comparisons.

**References**

Fraker, M. E. 2008. The influence of the circadian rhythm of green frog (*Rana clamitans*) tadpoles on their antipredator behavior and the strength of the nonlethal effects of predators. *The American Naturalist* 171: 545–552.

Hothorn, T., Bretz, F., and Westfall, P. 2008. Simultaneous inference in general parametric models. *Biometrical Journal: Journal of Mathematical Methods in Biosciences* 50: 346–363.

Iseki, R. 2016. Anovakun (Version 4.8.0). http://riseki.php.xdomain.jp/.

Jara, F. G., and Perotti, M. G. 2010. Risk of predation and behavioural response in three anuran species: influence of tadpole size and predator type. *Hydrobiologia* 644: 313–324.

Kishida, O., and Nishimura, K. 2005. Multiple inducible defenses against multiple predators in anuran tadpoles (*Rana pirica*). *Evolutionary Ecology Research* 7: 619–631.

Kishida, O., and Nishimura, K. 2006. Flexible architecture of inducible morphological plasticity. *Journal of Animal Ecology* 75: 705–712.

Kishida, O., Trussell, G. C., Ohno, A., Kuwano, S., Ikawa, T., and Nishimura, K. 2011. Predation risk suppresses the positive feedback between size structure and cannibalism. *Journal of Animal Ecology* 80: 1278–1287.

Kuznetsova, A., Brockhoff, P. B., and Christensen, R. H. B. 2017. lmerTest package: tests in linear mixed effects models. *Journal of Statistical Software* 82.

Lagrue, C., Besson, A. A., and Lecerf, A. 2015. Interspecific differences in antipredator strategies determine the strength of non-consumptive predator effects on stream detritivores. *Oikos* 124: 1589–1596.

Laurila, A., Kujasalo, J., and Ranta, E. 1997. Different antipredator behaviour in two anuran tadpoles: effects of predator diet. *Behavioral Ecology and Sociobiology* 40: 329–336.

Laurila, A., Pakkasmaa, S., and Merilä, J. 2006. Population divergence in growth rate and antipredator defences in *Rana arvalis*. *Oecologia* 147: 585–595.

Laurila, A., Lindgren, B., and Laugen, A. T. 2008. Antipredator defenses along a latitudinal gradient in *Rana temporaria*. *Ecology* 89: 1399–1413.

Rudolf, V. H. 2008. The impact of cannibalism in the prey on predator-prey systems. *Ecology* 89: 3116–3127.

Schoeppner, N. M., and Relyea, R. A. 2009. Phenotypic plasticity in response to fine‐grained environmental variation in predation. *Functional Ecology* 23: 587–594.

Van Buskirk, J. 1989. Density-dependent cannibalism in larval dragonflies. *Ecology* 70: 1442–1449.

Van Buskirk, J. 2002. Phenotypic lability and the evolution of predator‐induced plasticity in tadpoles. *Evolution* 56: 361–370.

Wissinger, S., and McGrady, J. 1993. Intraguild predation and competition between larval dragonflies: direct and indirect effects on shared prey. *Ecology* 74: 207–218.

**Table S1.** Summary of sample collections.

| Species | Locality | Latitude | Longitude | Date | *N* | Experiment |
| --- | --- | --- | --- | --- | --- | --- |
| *Rana pirica* | Kamiiso | 41.8603 | 140.5994 | 2020/4/18 | 10 | Laboratory experiment |
|  | Uryu | 44.4476 | 142.1839 | 2020/6/3 | 10 | Field experiment |
| *Aeshna* spp. | Chitose | 42.8100 | 141.5765 | 2020/3/30 | 3 | Field experiment |
|  | Asahikawa | 43.6903 | 142.2946 | 2020/5/5 | 20 | Laboratory experiment |
|  | Teshio-A | 45.0560 | 142.1071 | 2020/6/18 | 13 | Field experiment |
|  | Teshio-B | 45.0842 | 142.0295 | 2020/6/18, 7/20 | 64 | Field experiment |

Notes: *N*, number of egg masses and individuals for *Rana pirica* and *Aeshna* larva, respectively; Experiment, the experiment in which samples were used.

**Table S2.** Results of the repeated measures ANOVA to confirm the effect of the *Aeshna* mortality on tadpole activity (logit-transformed activity rate) in the field experiment. Treatment and mortality of *Aeshna* larva were fixed factors and time was a repeated measure. Significant *P* values are indicated in bold.

| Factors | *F* | *P* |
| --- | --- | --- |
| Treatment (T) | *F*1, 15 = 17.58 | **0.0008** |
| Mortality of *Aeshna* larva (M) | *F*1, 15 = 2.53 | 0.1328 |
| T × M | *F*1, 15 = 0.86 | 0.3671 |
| time (h) | *F*12, 180 = 6.15 | **<0.0001** |
| T × h | *F*12, 180 = 3.15 | **0.0004** |
| M × h | *F*12, 180 = 1.62 | 0.0897 |
| T × M × h | *F*12, 180 = 0.84 | 0.6065 |

Notes: The factor treatment (T) contained two levels: proximate risk and remote risk. The factor mortality of *Aeshna* larva (M) contained two levels: occurred and did not occur.

**Table S3.** Results of the LMM to confirm the effect of *Aeshna* mortality on tadpole morphology (size-adjusted maximum tail depth) in the field experiment. Treatment and mortality of *Aeshna* larva were fixed factors and experimental unit per treatment was a random factor. Significant *P* values are indicated in bold.

| Factors | *F* | *Pr*(> *F*) |
| --- | --- | --- |
| Treatment (T) | *F*1, 230.77 = 4.85 | **0.0286** |
| Mortality of *Aeshna* larva (M) | *F*1, 52.91 = 1.36 | 0.2488 |
| T × M | *F*1, 23.39 = 0.37 | 0.5505 |

Notes: The factor treatment (T) contained two levels: proximate risk and remote risk. The factor mortality of *Aeshna* larva (M) contained two levels: occurred and did not occur.
